# Supplementary material for: Computational Study for the Unbinding Routes of β-N-Acetyl-d-Hexosaminidase Inhibitor: Insight from Steered Molecular Dynamics Simulations
Source: Int J Mol Sci. 2019 Mar 26;20(6):1516. doi: 10.3390/ijms20061516 (PMC6471479; doi:10.3390/ijms20061516)
Supplement: Supplementary file 1 [file ijms-20-01516-s001.pdf]

# **Computational study for the unbinding routes of $\beta$ -N-Acetyl-D-hexosaminidase inhibitor: insight from steered molecular dynamics simulations**

Song Hu, Xiao Zhao, Li Zhang\*

*Department of Applied Chemistry, College of Science, China Agricultural University, Beijing, China*

Corresponding Authors\* E-mail: zhang\_li@cau.edu.cn

Contents:

**Figure S1.** (a) The binding pocket of OfHex1. (b) The structure of TMG-chitotriomycin.

**Figure S2.** The distance between O4 atom of the ligand and NE1 atom of the receptor versus time. CMD1 in black, CMD2 in red, CMD3 in blue.

**Figure S3.** Root-mean-square deviation (RMSD) variation of ligand with respect to simulation time. CMD1 in black, CMD2 in red, CMD3 in blue.

**Figure S4.** Root-mean-square deviation (RMSD) variation of receptor with respect to simulation time. CMD1 in black, CMD2 in red, CMD3 in blue.

**Figure S5.** Structure comparison of two loops for the conversional MDs (a) CMD1 (yellow), (b) CMD2 (pink) and (c) CMD3 (red) with the crystal structure (blue).

**Figure S6.** Dissociation routes of TMG-chitotriomycin from OfHex1 identified clustered by CAVER from 100 snapshots of the last 5ns.

**Figure S7.** The average work versus the distance of ligand dissociation from the receptor

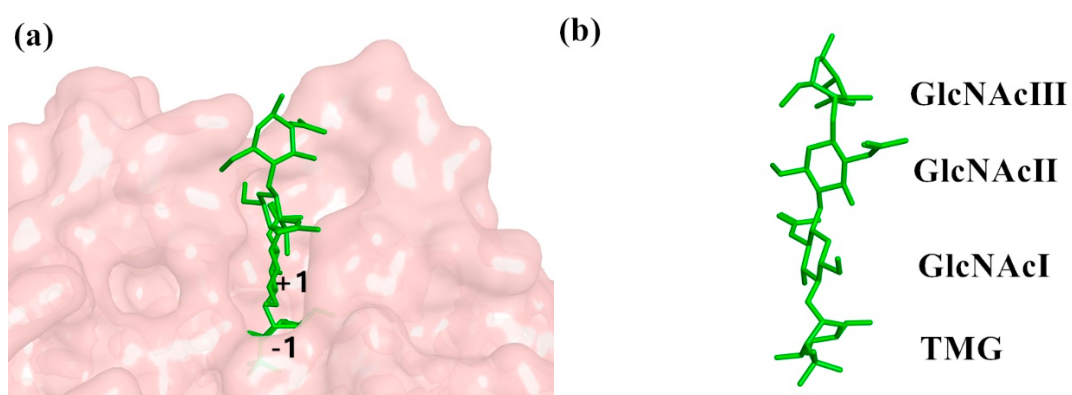

**Figure S1.** (a) The binding pocket of OfHex1. (b) The structure of TMG-chitotriomycin.

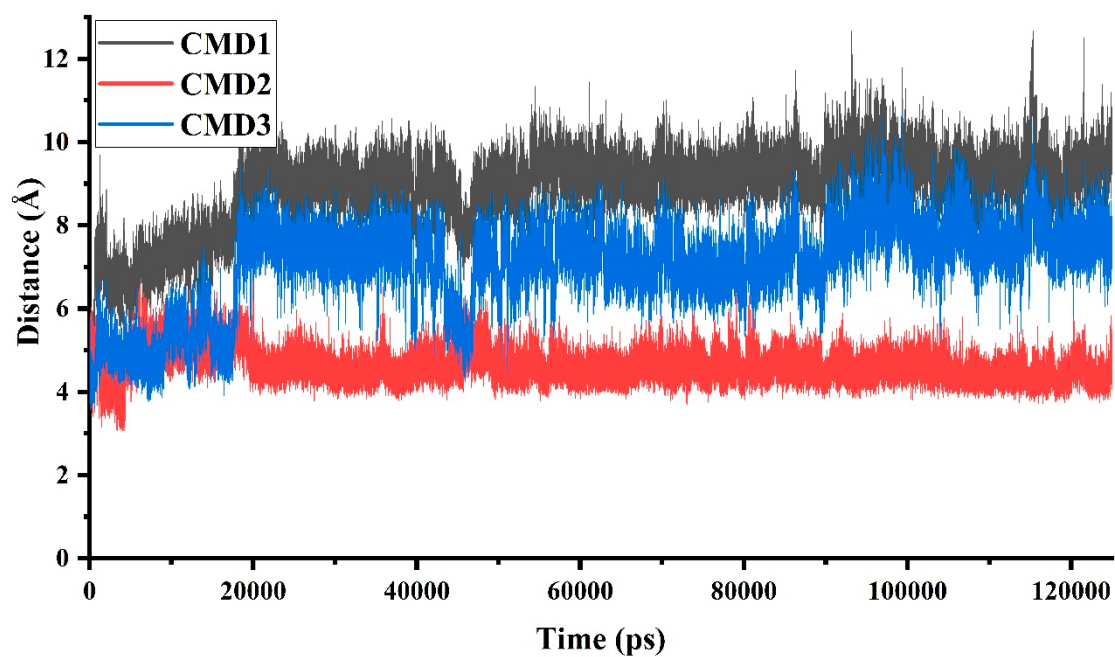

**Figure S2.** The distance between O4 atom of the ligand and NE1 atom of the receptor versus time. CMD1 in black, CMD2 in red, CMD3 in blue.

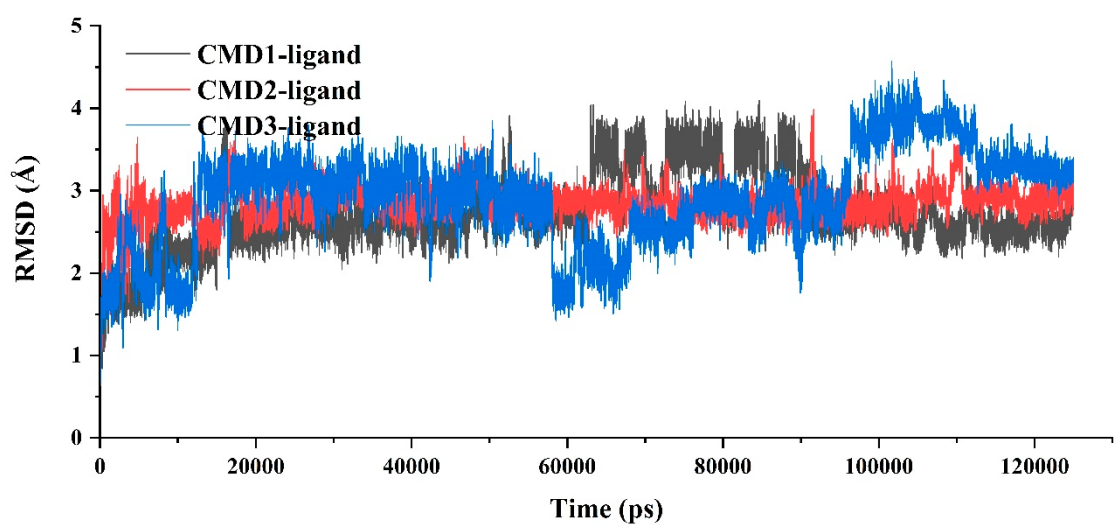

**Figure S3.** Root-mean-square deviation (RMSD) variation of ligand with respect to simulation time. CMD1 in black, CMD2 in red, CMD3 in blue.

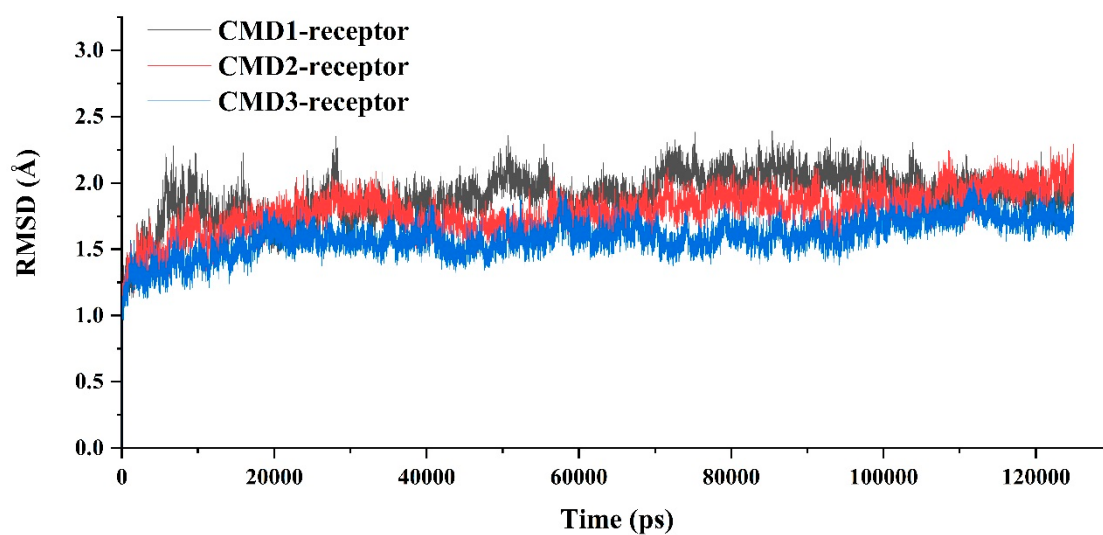

**Figure S4.** Root-mean-square deviation (RMSD) variation of receptor with respect to simulation time. CMD1 in black, CMD2 in red, CMD3 in blue.

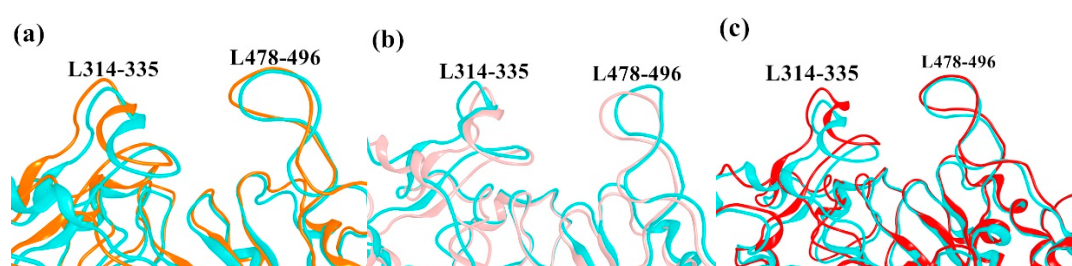

**Figure S5.** Structure comparison of two loops for the conversional MDs (a) CMD1 (yellow), (b) CMD2 (pink) and (c) CMD3 (red) with the crystal structure (blue).

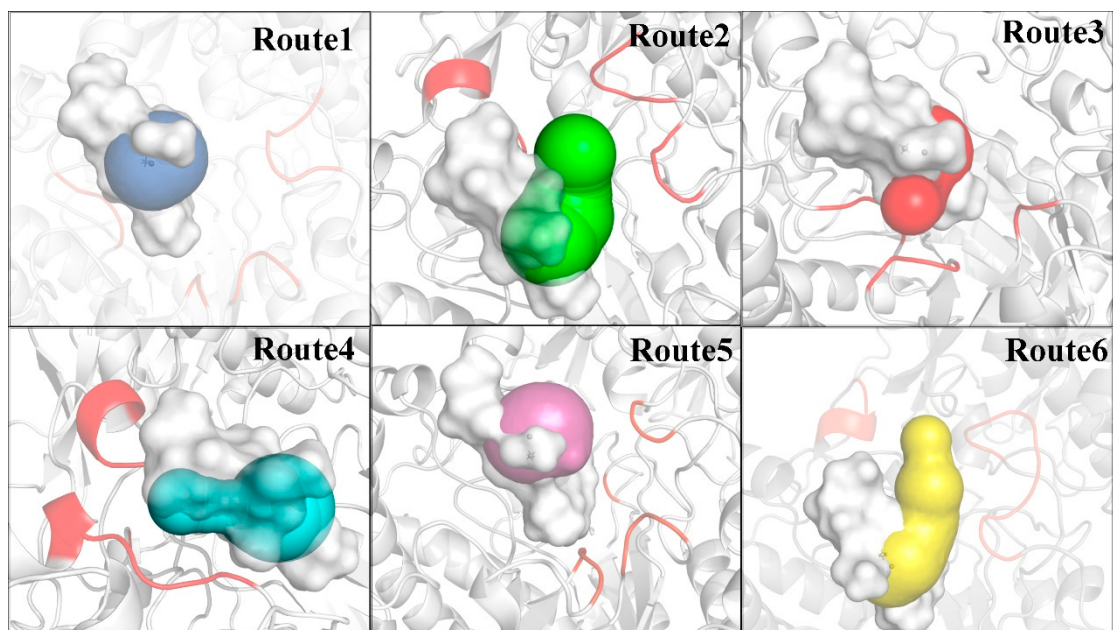

**Figure S6.** Dissociation routes of TMG-chitotriomycin from O/Hex1 clustered by CAVER from 100 snapshots of the last 5ns.

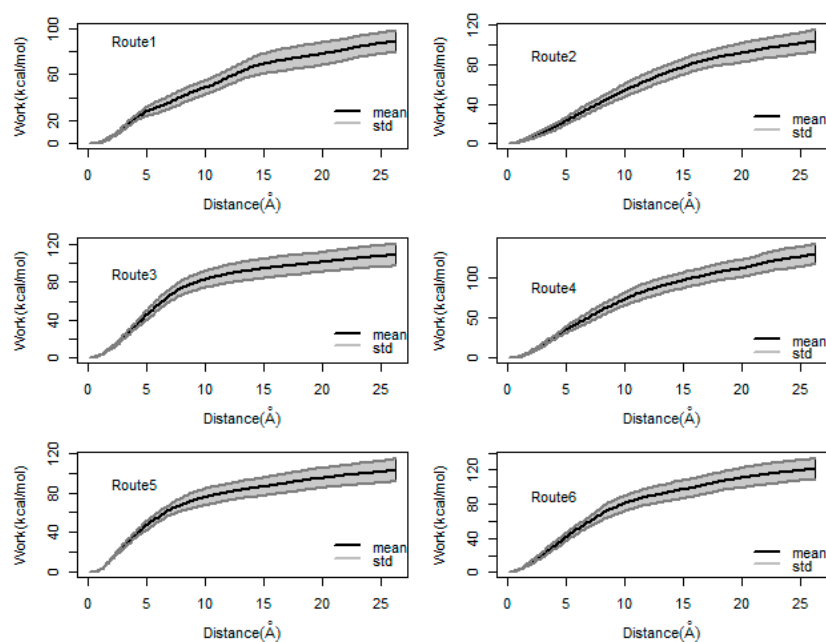

**Figure S7.** The average work versus the distance of ligand dissociation from the receptor
